# Supplementary material for: Low-intensity Pulsed Ultrasound-mediated Blood-brain Barrier Opening Increases Anti-programmed Death-ligand 1 Delivery and Efficacy in Gl261 Mouse Model
Source: Preprints.org preprint supplement (doi:10.20944/preprints202212.0170.v1), 2022-12-09

## **Low-intensity pulsed ultrasound-mediated blood-brain barrier opening increases anti-programmed death-ligand 1 delivery and efficacy in GL261 mouse model**

Mohammed Ahmed<sup>1\*</sup>, Isaias Hernández-Verdin<sup>1</sup>, Emie Quissac<sup>1</sup>, Nolwenn Lemaire<sup>1</sup>, Coralie L Guerin<sup>2</sup>, Lea Guyonnet<sup>2</sup>, Noël Zahr<sup>3</sup>, Laura Mouton<sup>1</sup>, Mathieu Santin<sup>1</sup>, Alexandra Petiet<sup>1</sup>, Charlotte Schmitt<sup>4</sup>, Guillaume Bouchoux<sup>4</sup>, Michael Canney<sup>4</sup>, Marc Sanson<sup>5</sup>, Maite Verreault<sup>1</sup>, Alexandre Carpentier<sup>4,5</sup>, Ahmed Idbaih<sup>5\*</sup>

### **Material and Methods**

Samples were acquired on a spectral flow cytometer (Aurora, Cytex) and analyzed by FlowJo software (FlowJo, LLC). Briefly, cells were selected based on their morphology, doublets, and dead cells were excluded using (Biolegend, #423107) while tumor cells were excluded based on their *mKate* expression. Monocytes (Ly6C<sup>+</sup> Ly6G<sup>-</sup>) and neutrophils (Ly6C<sup>+</sup> Ly6G<sup>+</sup>) were excluded from non-tumoral live cells using Ly-6C (Biolegend, #128036) and Ly-6G (Biolegend, #127617). Microglia were identified based on their expression of CD11b<sup>+</sup> and CD45<sup>low</sup> using CD45 (Biolegend, #103131) and CD11b (Biolegend, #101255). Activated microglia were identified as CD68<sup>+</sup> using (Biolegend, #137003). F4/80 marker (Biolegend, #123117) was used to determine macrophages in the CD45<sup>high</sup> CD11b<sup>+</sup> cell population. CD206 marker (Biolegend, #141729) was used to distinguish between subpopulations of macrophages. Lymphocytes CD4<sup>+</sup> (Biolegend, #100541) and CD8<sup>+</sup> (Biolegend, #100737) were identified on the CD45<sup>+</sup> CD11b<sup>-</sup> fraction of non-tumoral live cells. The percentage of each subpopulation was calculated and used in our flow cytometry analyses.

**Supplemental Figure 1:** Schematic representation of LIPU procedure. (A) Graphical representation of LIPU generator set up. (B) Experimental timeline for anti-PD-1 treatment with BBB disruption. (C) IHC of tumor size in UMBO plus anti-PD-L1 (the right image) at day 45 compared to anti-PD-L1 (the left image) treated mice. (D) A representative gating strategy illustrating immune cell population being subgated to the levels of microglia, lymphocytes and macrophages.

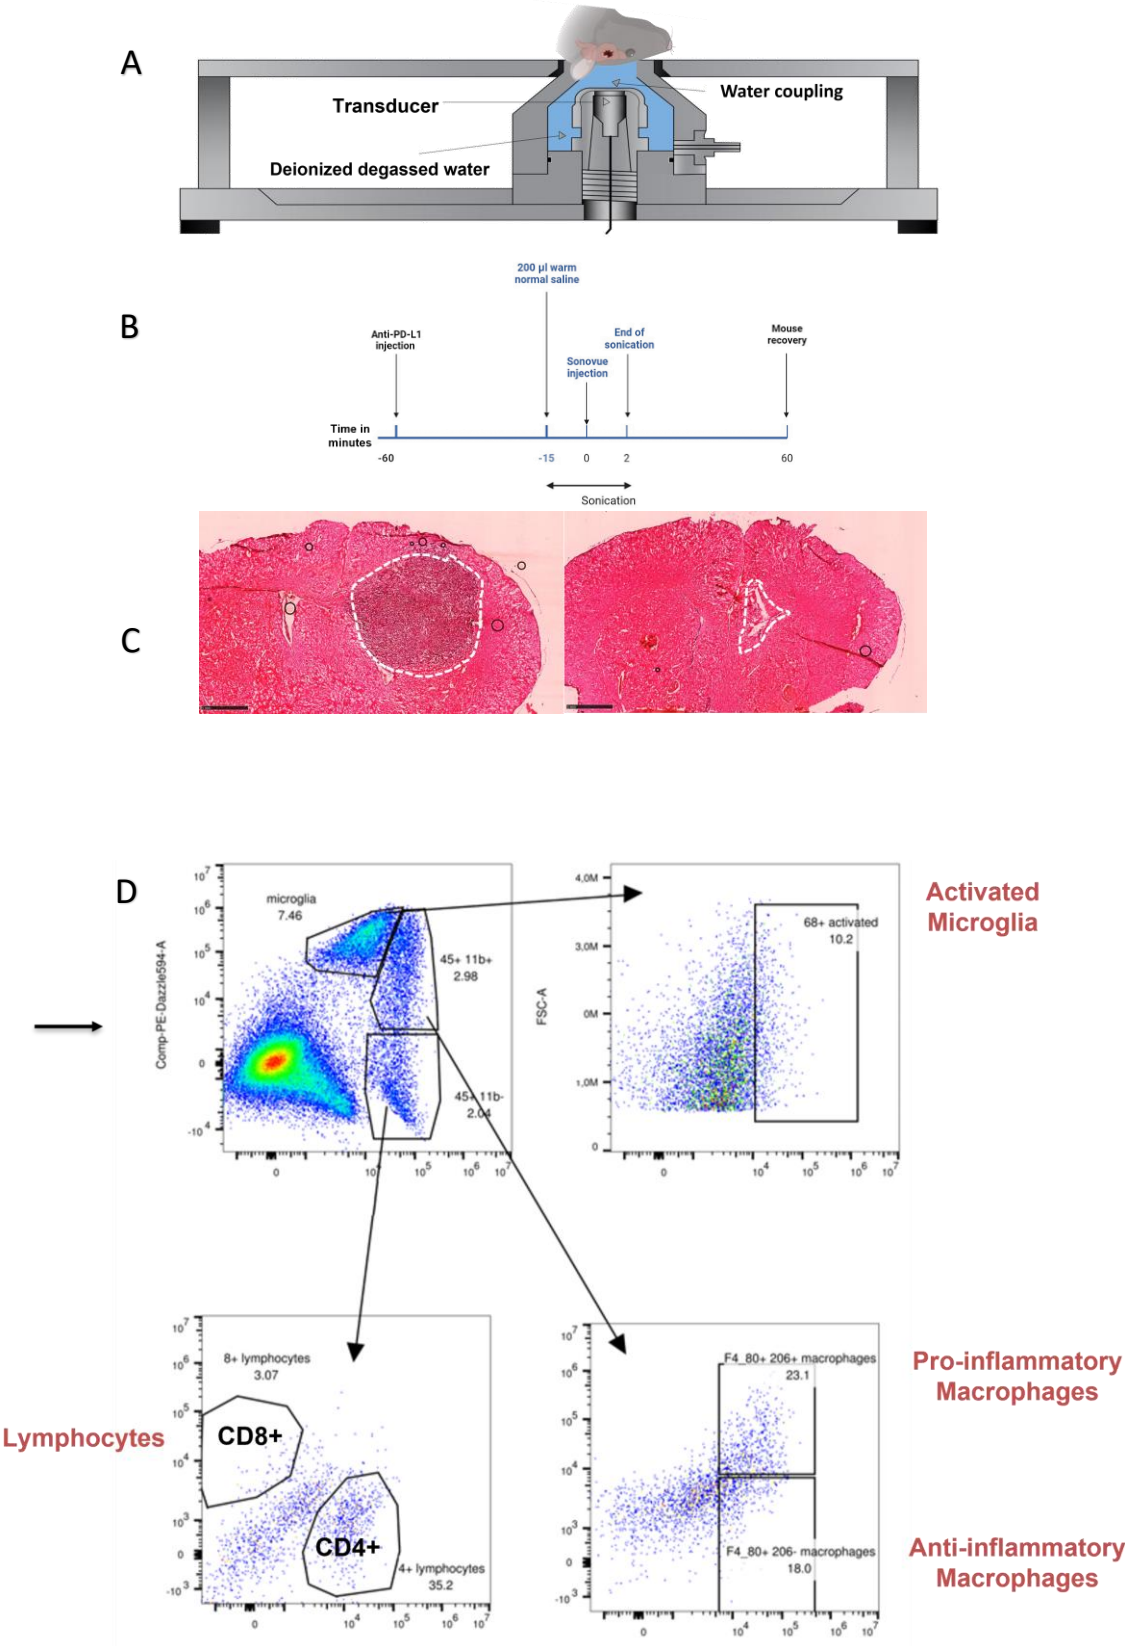

Supplement: Supplementary file 1 [file supplementary]
